# Supplementary material for: NT5M-mediated R-loop stabilization promotes clear cell renal cell carcinoma progression
Source: Research Square preprint supplement (doi:10.21203/rs.3.rs-7234447/v1), 2025-09-02
Supplement: Supplementary file 1 [file a713717c7393b99bb329230a.docx]

**Supplementary Table S1.**

| **Primers used for Real-time qPCR** | |
| --- | --- |
| **Name** | **Sequence** |
| NT5M forward | CTGACTTCGAGGGCGGATTC |
| NT5M reverse | TCTTTGACTCCCAAATGCTGATG |
| DDX5 forward | ATGTCGGGTTATTCGAGTGACC |
| DDX5 reverse | TGTGCGCCTAGCCAAATCAG |
| USP7 forward | GGAAGCGGGAGATACAGATGA |
| USP7 reverse | AAGGACCGACTCACTCAGTCT |
| **ATM primers used for S9.6 DRIP and ChIP** | |
| **Name** | **Sequence** |
| ATM forward | AAAGGCGCCGAAATGAAACC |
| ATM reverse | CCTCCAAGTCTGAGGACGGA |
| **si(sh)RNA** | |
| **Name** | **Sequence** |
| sh-NT5M | 5’-CCAUCAAGAUGUUCAAGUACU-3’ |
| si-USP7 | 5’-AAAGGGCAGUCAAUAGAUACA-3’ |
| si-DDX5 | 5’-AACAUUACUUCCGUAUUGC/dT//dT/-3’ |
