# Supplementary figures and images for: NT5M-mediated R-loop stabilization promotes clear cell renal cell carcinoma progression
Source: Research Square preprint supplement (doi:10.21203/rs.3.rs-7234447/v1), 2025-09-02

Figure 1

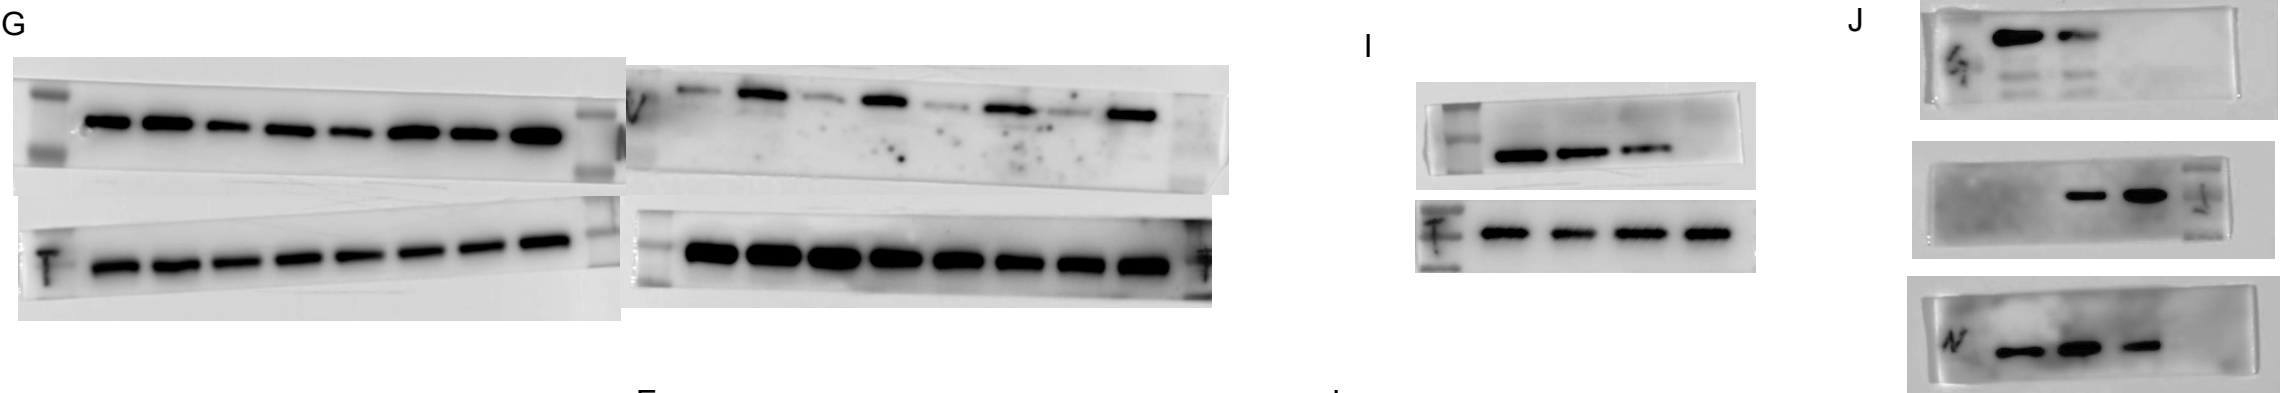

Figure 3

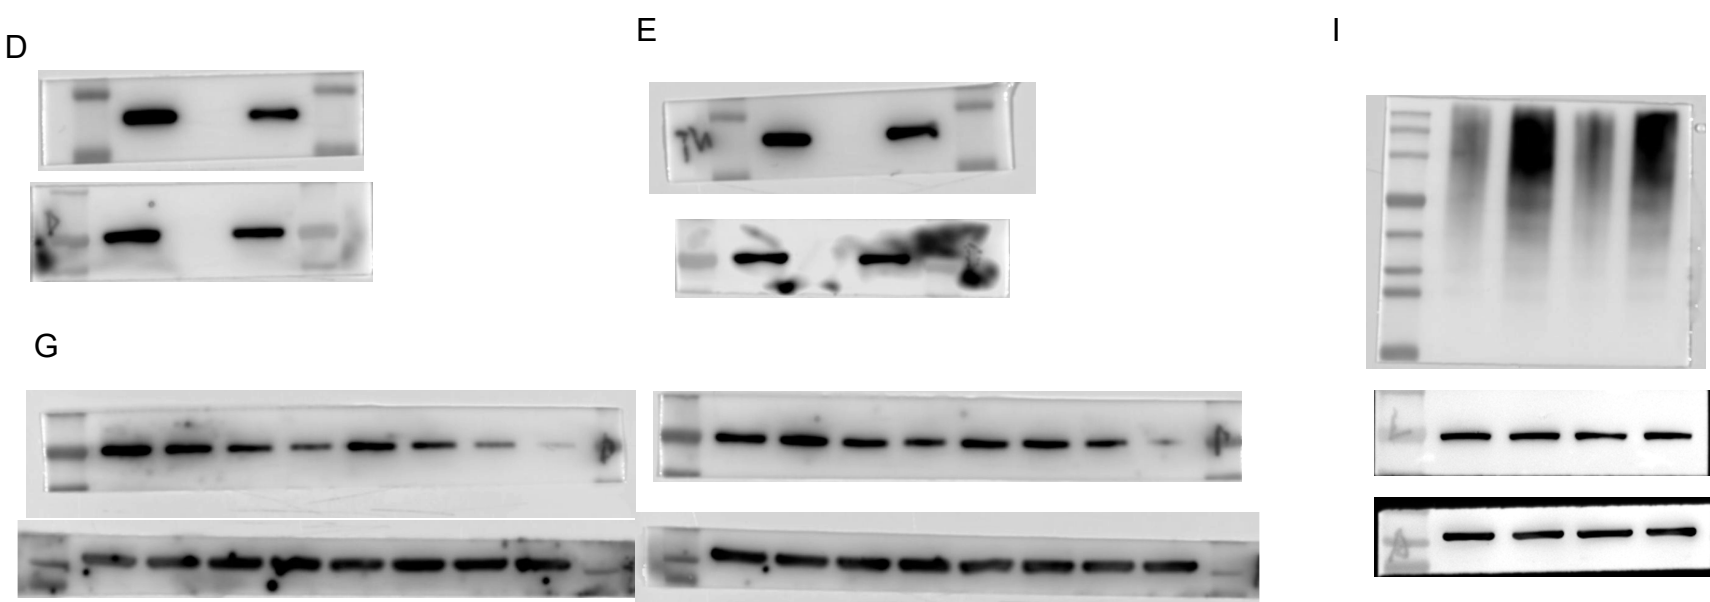

Figure 4

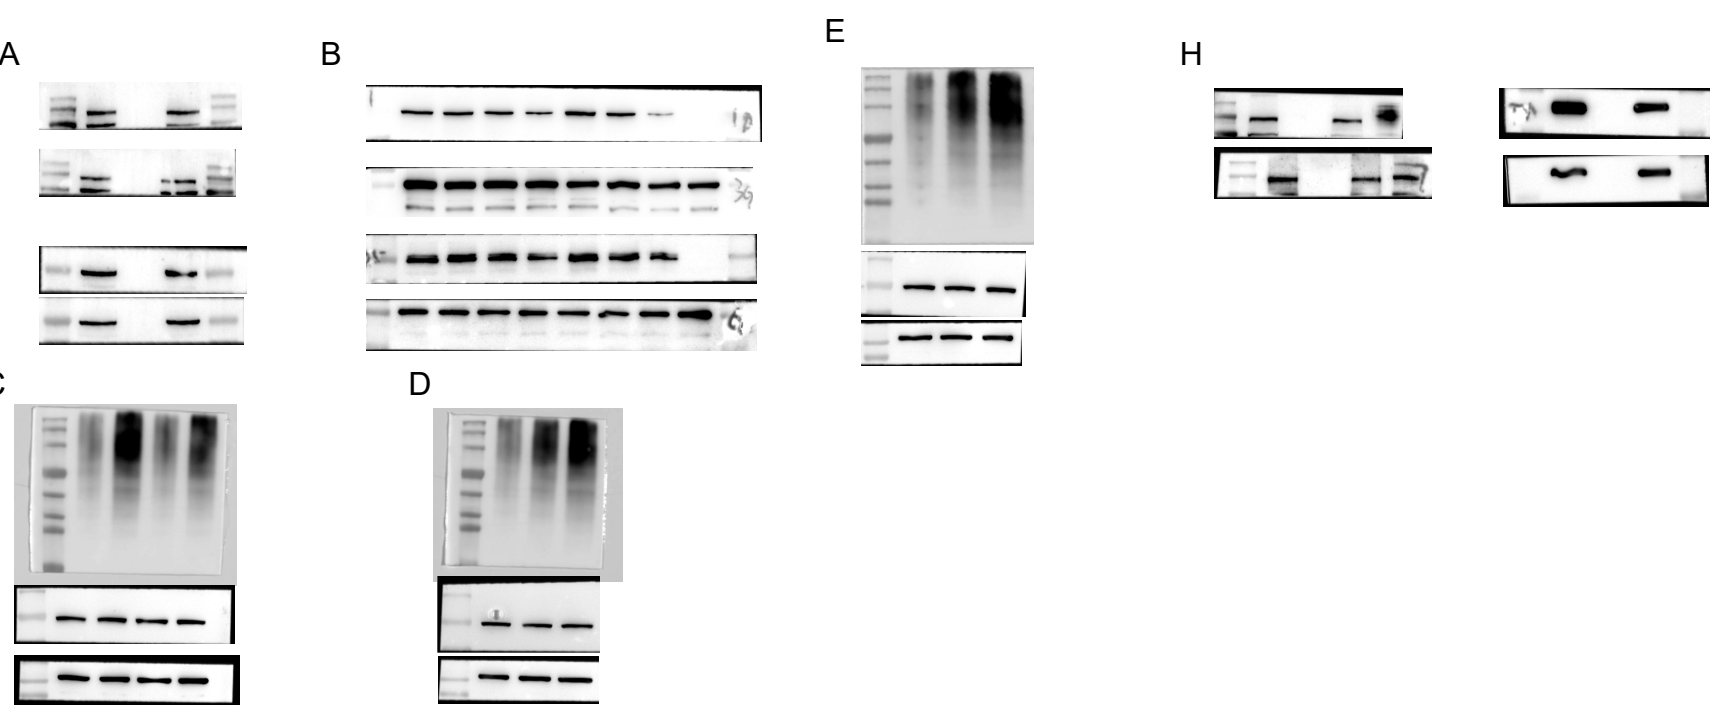

Figure 7

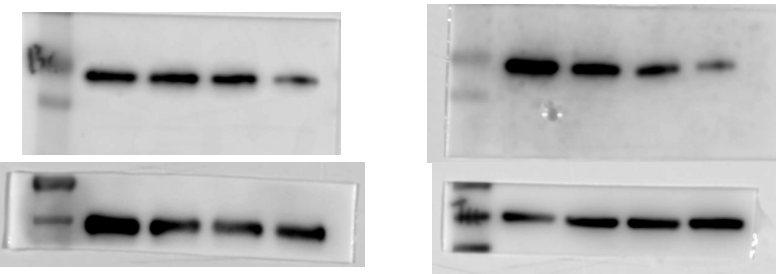

Figure S1

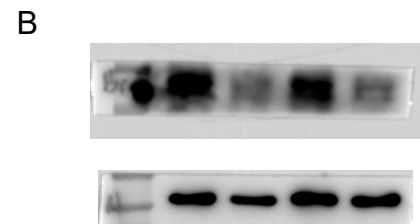

Figure S2

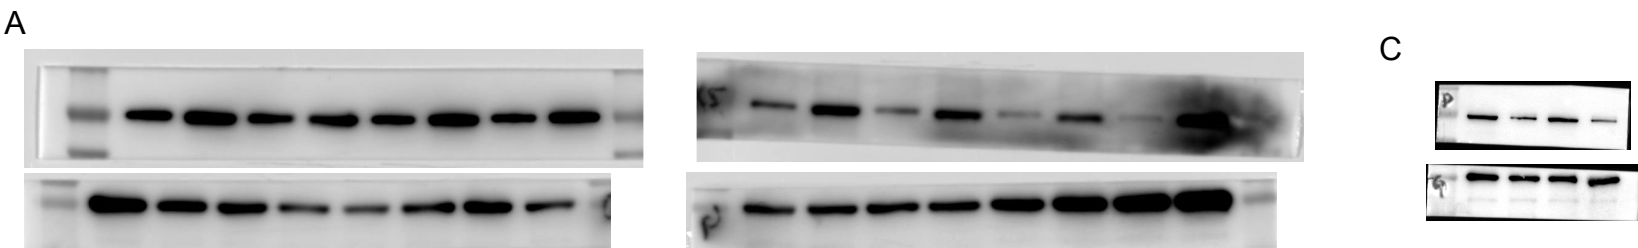

Figure S5

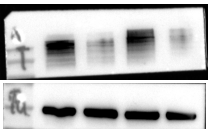

Supplement: Supplementary file 1 [file 57527e225c1bd45f51e35bc8.pdf]
